# Supplementary material
Source: HighWire-hosted journal article supplement (http://www.qdcxjkg.com/highwire/filestream/113550/field_highwire_adjunct_files/0/ERJ-00982-2012_Disclosures.pdf)
Supplement: ERJ-00982-2012_Disclosures.pdf [file ERJ-00982-2012_Disclosures.pdf]

**S. Kitada** received the enzyme immunoassay kit from Tauns laboratory Inc., free of charge.
